# Supplementary material for: Assessing Farmers’ Typologies of Perception for Adopting Sustainable Adaptation Strategies in Bangladesh
Source: MDPI journal article supplement (doi:10.3390/cli9120167), 2021-11-23
Supplement: s1 [file s1]

# Assessing Farmers' Typologies of Perception for Adopting Sustainable Adaptation Strategies in Bangladesh

Abu Reza Md. Towfiqul Islam <sup>1,2,3</sup>, Md. Hasanuzzaman <sup>1</sup>, Mahmud Jaman <sup>1</sup>, Edris Alam <sup>4,5</sup>, Javed Mallick <sup>6</sup>, G. M. Monirul Alam <sup>7</sup>, Md. Abdus Sattar <sup>8</sup> and Kuaanan Techato <sup>2,3,\*</sup>

<sup>1</sup> Department of Disaster Management, Begum Rokeya University, Rangpur 5400, Bangladesh; towfiq\_dm@brur.ac.bd (A.R.M.T.I.); md.hasanuzaaman.bp@gmail.com (M.H.); mahmudjaman11@gmail.com (M.J.)

<sup>2</sup> Faculty of Environmental Management, Prince of Songkla University, Songkhla 90112, Thailand

<sup>3</sup> Environmental Assessment and Technology for Hazardous Waste Management Research Center, Faculty of Environmental Management, Prince of Songkla University, Songkhla 90110, Thailand

<sup>4</sup> Faculty of Resilience, Rabdan Academy, P.O. Box 114646, Abu Dhabi 114646, United Arab Emirates; ealam@ra.ac.ae

<sup>5</sup> Department of Geography and Environmental Studies, University of Chittagong, Chittagong 4331, Bangladesh

<sup>6</sup> Department of Civil Engineering, King Khalid University, Abha 61411, Saudi Arabia; jmallick@kku.edu.sa

<sup>7</sup> Department of Agribusiness, Bangabandhu Sheikh Mujibur Rahman Agricultural University, Gazipur 1706, Bangladesh; gmmonirul79@gmail.com

<sup>8</sup> Department of Disaster Risk Management, Patuakhali Science and Technology University, Patuakhali 8602, Bangladesh; abdu.sattar@pstu.ac.bd

\* Correspondence: kuaanan.t@psu.ac.th

**Table S1.** List of the 20 SASs and climate change statements.

| Serial No. | Attitudinal statements                                                                                           |
|------------|------------------------------------------------------------------------------------------------------------------|
| 1          | Does air pollution causes climate change?                                                                        |
| 2          | Does soil pollution causes climate change?                                                                       |
| 3          | Does water pollution causes climate change?                                                                      |
| 4          | Does plastic pollution causes climate change?                                                                    |
| 5          | Does using pesticides causes climate change?                                                                     |
| 6          | Does mills/industry/car smoke/CO <sub>2</sub> causes climate change?                                             |
| 7          | Does unawareness of the negative consequences of climate change due to manmade activities causes climate change? |
| 8          | Does refrigeration causes climate change?                                                                        |
| 9          | Does other human influenced factors causes climate change?                                                       |
| 10         | Is annual mean temperature changing due to climate change?                                                       |
| 11         | Has annual mean precipitation been changed due to climate change?                                                |
| 12         | Has the seasonal variation in terms of duration and starting time been changed due to climate change?            |
| 13         | Does drought and flood occur frequently due to climate change?                                                   |
| 14         | Is temperature rising due to climate change?                                                                     |
| 15         | Is solar radiation increasing due to climate change?                                                             |
| 16         | Is humidity level high due to climate change?                                                                    |
| 17         | Is deforestation influence the climate change?                                                                   |
| 18         | Does natural Factors (Sun's heating imbalance etc.) influence the climate change?                                |
| 19         | Do they use indigenous knowledge for agricultural production?                                                    |
| 20         | Is alternative crop species increasing ?                                                                         |
